# Supplementary material for: A natural light-driven inward proton pump
Source: PubMed Central journal article supplement (PMC5118547; doi:10.1038/ncomms13415), 2016-11-17
Supplement: ncomms13415-s1.pdf [file ncomms13415-s1.pdf]

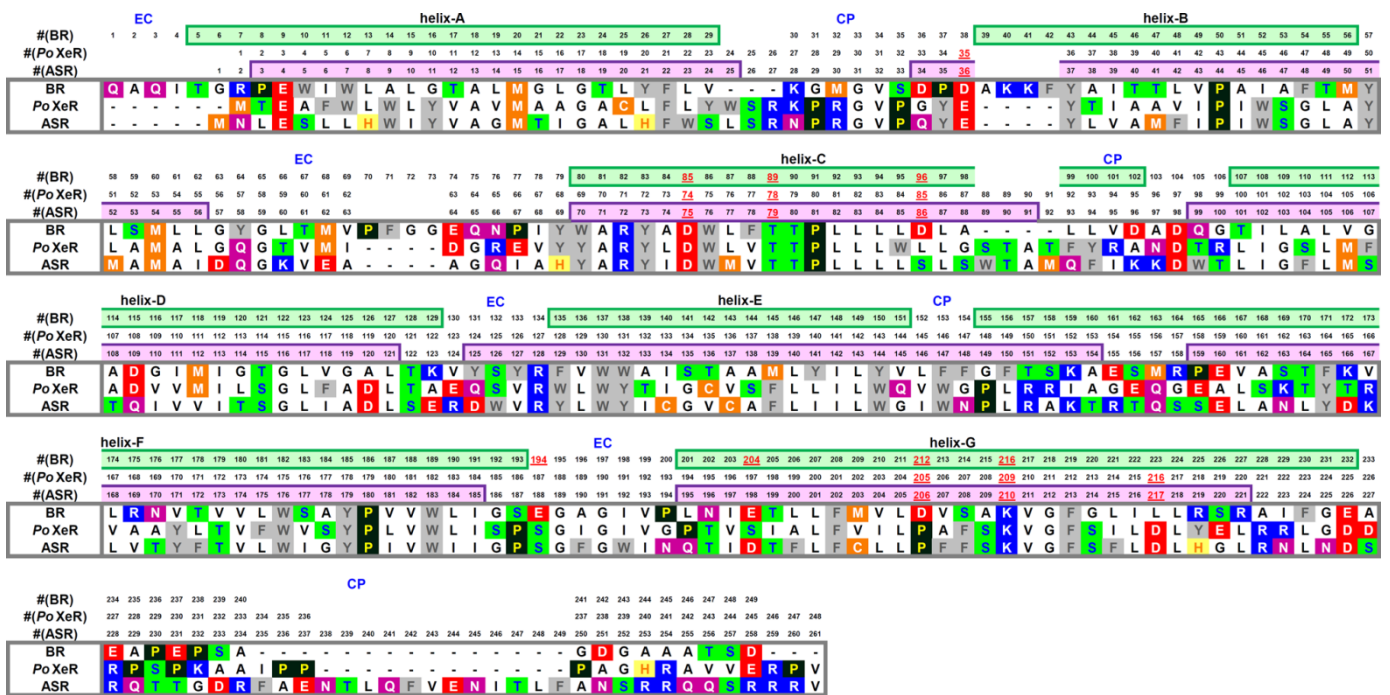

**Supplementary Figure 1 Sequence alignment of selected microbial rhodopsins.** The alignment of amino acid sequences of BR, *PoXeR* and ASR. The numbers of their motifs, the homologous residues to the secondary counterion of BR (BR D212), the lysine residue forming Schiff-base linkage with retinal and the residues involved in H<sup>+</sup> transport are highlighted as red and underlined characters. The positions of transmembrane helices are indicated by green and purple rectangles for BR and ASR according to their X-ray crystallographic structures (PDB ID: 1M0L (BR) and 1XIO (ASR)), respectively.

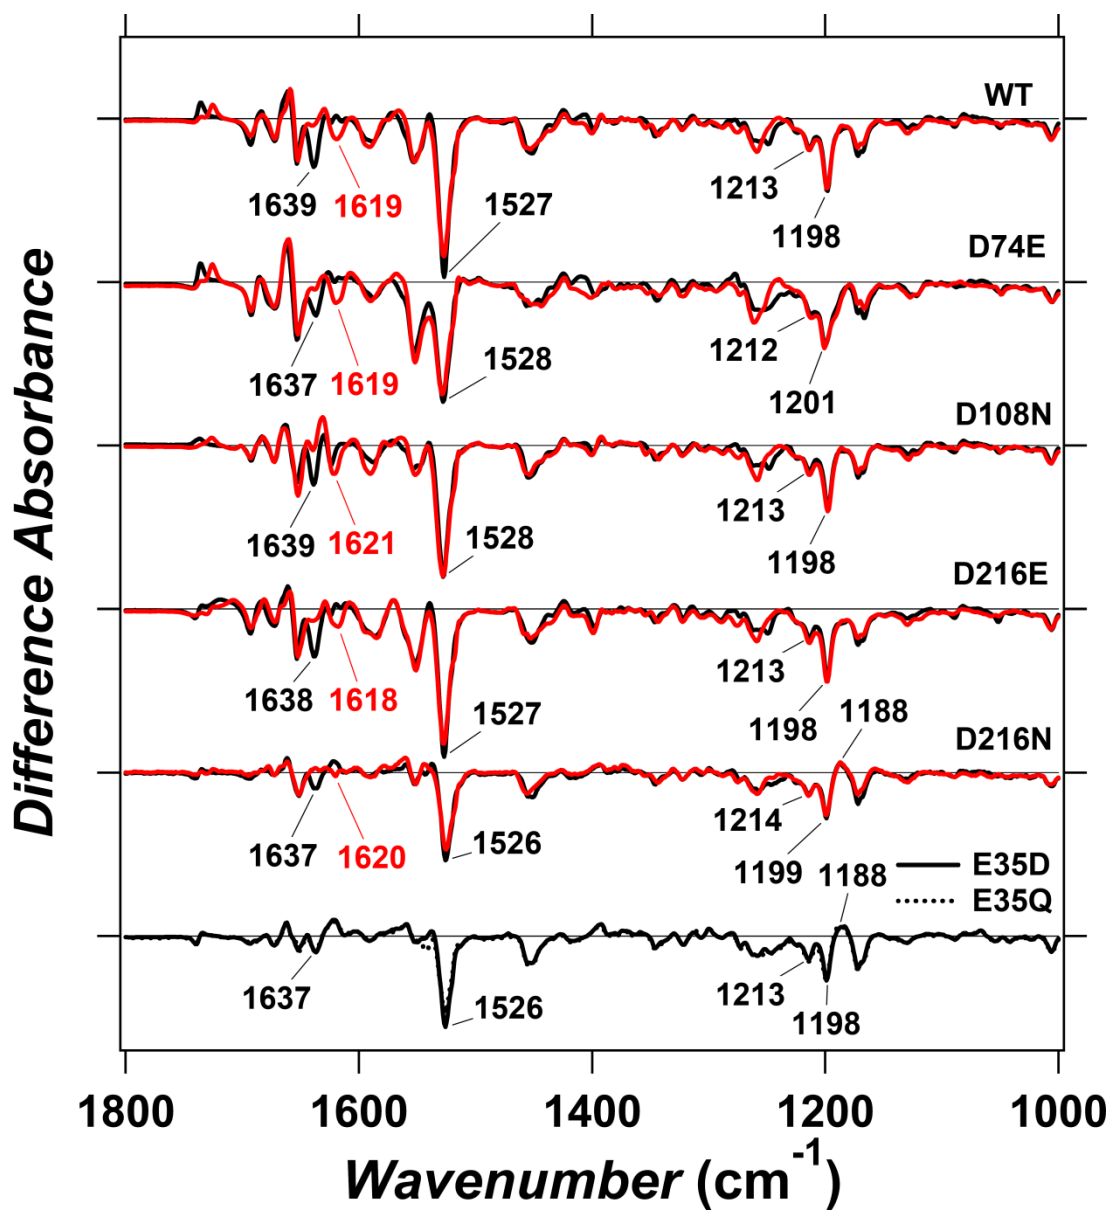

Supplementary Figure 2 Light-induced FTIR difference spectra of *PoXeR* mutants in the 1800-1000 cm<sup>-1</sup> region at  $T = 230$  K and pH 8.0. Black and red lines represent the samples hydrated with H<sub>2</sub>O and D<sub>2</sub>O, respectively.

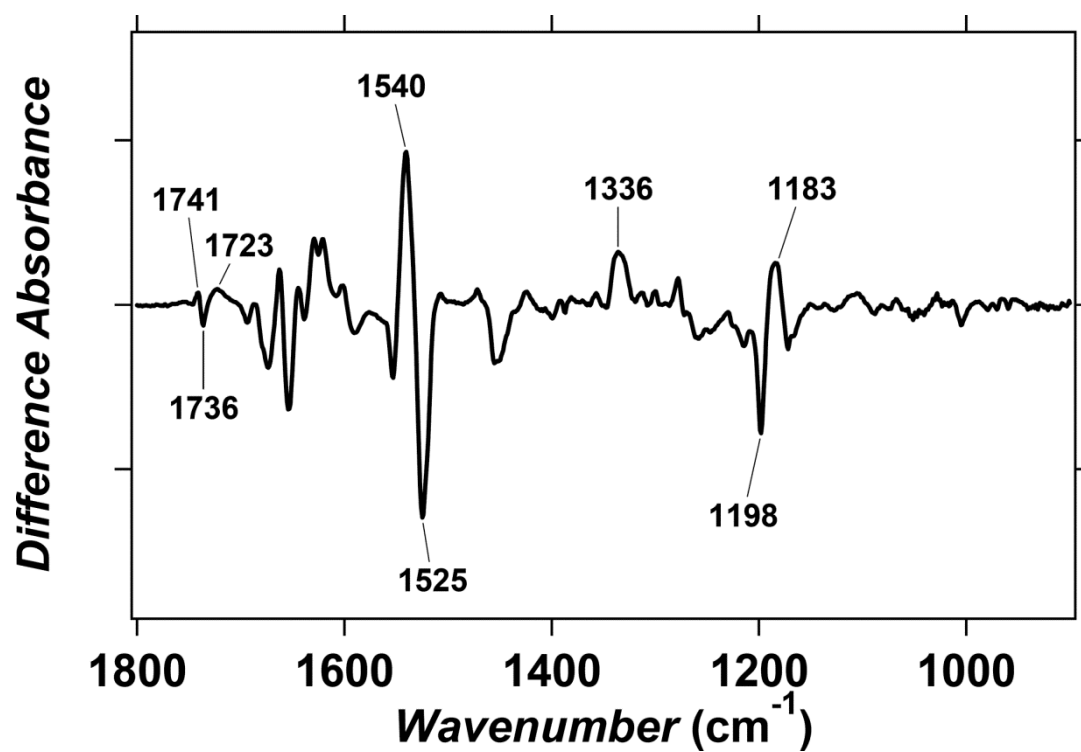

Supplementary Figure 3 Light-induced FTIR difference spectra of *PoXeR* mutants and *PoXeR*<sub>13C</sub> in the 1800-1000 cm<sup>-1</sup> region at  $T = 230$  K and pH 8.0. The sample was hydrated with H<sub>2</sub>O.
